# Supplementary material
Source: HighWire-hosted journal article supplement (https://erj.ersjournals.com/content/56/3/1901892)
Supplement: inline-supplementary-material-1 [file inline-supplementary-material-1.pdf]

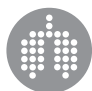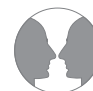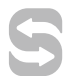

SHAREABLE PDF

# Evaluation of pulmonary hypertension by right heart catheterisation: does timing matter?

Athiththan Yogeswaran <sup>1</sup>, Manuel Jonas Richter<sup>1</sup>, Natascha Sommer<sup>1</sup>, Hossein Ardeschir Ghofrani <sup>1,2,3</sup>, Werner Seeger <sup>1</sup>, Henning Gall <sup>1</sup> and Khodr Tello<sup>1</sup>

**Affiliations:** <sup>1</sup>Dept of Internal Medicine, Justus-Liebig-University Giessen, Universities of Giessen and Marburg Lung Center (UGMLC), Member of the German Center for Lung Research (DZL), Giessen, Germany. <sup>2</sup>Dept of Pneumology, Kerckhoff Heart, Rheuma and Thoracic Center, Bad Nauheim, Germany. <sup>3</sup>Dept of Medicine, Imperial College London, London, UK.

**Correspondence:** Henning Gall, Dept of Internal Medicine, Justus-Liebig-University Giessen, Klinikstrasse 32, 35392 Giessen, Germany. E-mail: [henning.gall@innere.med.uni-giessen.de](mailto:henning.gall@innere.med.uni-giessen.de)

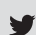

@ERSpublications

**In patients undergoing right heart catheterisation, the timing of haemodynamic measurement after sheath insertion (immediately or after a short resting period) influences the diagnosis, classification and risk stratification of pulmonary hypertension** <https://bit.ly/2yHN9xq>

**Cite this article as:** Yogeswaran A, Richter MJ, Sommer N, *et al.* Evaluation of pulmonary hypertension by right heart catheterisation: does timing matter?. *Eur Respir J* 2020; 56: 1901892 [<https://doi.org/10.1183/13993003.01892-2019>].

This single-page version can be shared freely online.

## To the Editor:

Haemodynamic measurements from right heart catheterisation (RHC) are used for diagnosis and risk stratification in pulmonary hypertension (PH) [1]. The risk stratification scheme implemented in the guidelines for pulmonary arterial hypertension (PAH) has been validated in real-life cohorts [1–5]. However, the timing of measurements during RHC is not specified. We aimed to investigate the influence of the timing of measurements on RHC parameters and the consequences for risk stratification and diagnosis.
